# Supplementary material for: A pH-sensitive switch activates virulence in Salmonella
Source: eLife. 2023 Sep 14;12:e85690. doi: 10.7554/eLife.85690 (PMC10519707; doi:10.7554/eLife.85690)
Supplement: Figure 3—figure supplement 2—source data 1. [file elife-85690-fig3-figsupp2-data1.xlsx]

## Sheet: S5
RAW macrophage infection
		Fold replication (16h/2h)
		1	2	3		Average	Std dev
	WT	14.74	17.2	10.72		14.22	3.27115
	H12Q	1.81	2.26	1.9		1.99	0.238118
	ΔssrB	1.84	1.85	2.38		2.02333	0.308923
t-Test: Two-Sample Assuming Equal Variances					t-Test: Two-Sample Assuming Equal Variances
	WT	H12Q				ΔssrB	H12Q
Mean	14.22	1.99			Mean	2.02333	1.99
Variance	10.7004	0.0567			Variance	0.0954333	0.0567
Observations	3	3			Observations	3	3
Pooled Variance	5.37855				Pooled Variance	0.0760667
Hypothesized Mean Difference	0				Hypothesized Mean Difference	0
df	4				df	4
t Stat	6.45862				t Stat	0.148022
P(T<=t) one-tail	0.00147964				P(T<=t) one-tail	0.444744
t Critical one-tail	2.13185				t Critical one-tail	2.13185
P(T<=t) two-tail	0.00295929				P(T<=t) two-tail	0.889487
t Critical two-tail	2.77645				t Critical two-tail	2.77645
