# Supplementary material for: A pH-sensitive switch activates virulence in Salmonella
Source: eLife. 2023 Sep 14;12:e85690. doi: 10.7554/eLife.85690 (PMC10519707; doi:10.7554/eLife.85690)
Supplement: Figure 4—source data 1. [file elife-85690-fig4-data1.xlsx]

## Sheet: Fig 4a
Phosphorylated protein vs phosphodonor concentration
Phosphoramidate	SsrB pH 7.4									Phosphoramidate	H12Q pH 7.4
(mM)	1	2	3	4		Average	Std err			(mM)	1	2	3	4		Average	Std err
0	0	3.8	0	0		0.95	0.95			0	0	0	0	5.69351		1.42338	1.42338
0.5	11.76	12.84	9.13			11.2433	1.1017			1	10.6202	16.2485				13.4344	2.81415
1	25.74	22.63	19.71			22.6933	1.741			2.5	19.5883	28.5908	25.6033	26.48		25.0656	1.93038
1.5	40.89	32	29.17			34.02	3.53081			5	35.5342	48.5737				42.054	6.51974
2.5	52.52	50.1	61.923	68.2618		58.2012	4.21281			7.5	55.333	64.438				59.8855	4.5525
3.5	67.12	80.9775				74.0488	6.92876			10	51.8019	76.554				64.178	12.3761
5	77.15	73.52				75.335	1.815			15	71.6053	84.0347				77.82	6.21474
7.5	85.88	92.5901				89.2351	3.35507			25	79.2801	98.378				88.8291	9.54893
10	93.19	91.84				92.515	0.675			40	82.2868	99.7427	99.3407			93.79	5.7528
15	96	92.1894				94.0947	1.90532			60	82.4368	100				91.2184	8.78159
25	97.94	98.7				98.32	0.38
	Above data plotted on Prism, fitted to the hyperbolic equation to derive the following
	K0.5
	Mean	SEM
SsrB pH 7.4	2.87559	0.32867
H12Q pH 7.4	7.10622	1.06429

## Sheet: Fig 4bc
Phosphorylated protein vs time
	pH 7.4			pH 6.1			pH 7.4			pH 6.1
Time (min)	SsrB~P (%)		Time (min)	SsrB~P (%)		Time (min)	H12Q~ P (%)		Time (min)	H12Q~ P (%)
0	0		0	0		0	0		0	0
0.5	30.2776		2	26.444		2.5	31.9022		2	25.7766
1	43.1382		5	56.4079		5	55.6658		5	50.3968
2.5	70.6356		10	77.7394		10	77.3758		10	73.121
5	89.7984		20	86.3556		20	83.9328		20	83.9809
10	92.4152		40	90.4628		40	87.6229		40	88.6564
	Above data plotted on Prism, fitted to the single exponential decay curve to derive the following
	SsrB		H12Q
	pH 7.4	pH 6.1	pH 7.4	pH 6.1
Bmax	92.5 ± 3.9	89.8 ± 1.9	87.2 ± 2.1	88.0 ± 1.1
Kobs	0.62	0.19	0.2	0.17
