# Supplementary material for: A pH-sensitive switch activates virulence in Salmonella
Source: eLife journal article supplement (doi:10.7554/elife.85690), 2023-09-14
Supplement: supp [file elife-85690-supp-v1.zip]

## Sheet: Fig 2-Supplement fig 3ab
	PsifA-lacZ activity
SsrB construct	pH 7.4
	Exp 1		Exp 2		Exp 3			Average	Std dev
SsrB	100	100	100	100	100	100		100	0
H28A	80.5	101.8	91.5	87.2	81.9	68.2		85.1833	11.3246
H34A	96.2	101	223.4	106.8	128.4	66.2		120.333	54.3278
H72A	81.6	99.5	71.7	77.3	85.1	168.2		97.2333	36.0064
Vector	17.675	19.3885	14.0372					17.0336	2.73273
	PsifA-lacZ activity
SsrB construct	pH 5.6
	Exp 1		Exp 2		Exp 3			Average	Std dev
SsrB	314.8	462.8	445.6	890.4	379.4	514.7		501.283	202.882
H28A	221.3	463.1	300.7	531.7	302.1	344.3		360.533	115.293
H34A	263.4	471.4	685.8	657.8	496.7	539.9		519.167	152.065
H72A	246	459.8	386.3	481.1	479.2	356.7		401.517	91.8593
Vector	15.1989	20.1235	20.4266					18.583	2.9346
SsrB construct	Fold change (7.4/5.6)
	Exp 1		Exp 2		Exp 3			Average	Std dev
SsrB	3.14833	4.62798	4.45612	8.90436	3.79438	5.14732		5.01308	2.02885
H28A	2.74806	4.54779	3.2869	6.09577	3.68763	5.04486		4.23517	1.23497
H34A	2.73713	4.66946	3.06968	6.1583	3.86853	8.15374		4.77614	2.06025
H72A	3.01247	4.62098	5.38647	6.22084	5.62927	2.12016		4.49836	1.60707
Vector	0.85991	1.03791	1.45518					1.11767	0.305545
		t-Test: Two-Sample Assuming Unequal Variances
			SsrB	H28A		SsrB	H34A		SsrB	H72A
		Mean	5.01308	4.23517		5.01308	4.77614		5.01308	4.49836
		Variance	4.11622	1.52514		4.11622	4.24465		4.11622	2.58268
		Observations	6	6		6	6		6	6
		Hypothesized Mean Difference	0			0			0
		df	8			10			10
		t Stat	0.802256			0.200719			0.487128
		P(T<=t) two-tail	0.44558			0.844942			0.636669
		t Critical two-tail	2.306			2.22814			2.22814

## Sheet: Fig 2-Supplement fig 3cd
	PsifA-lacZ activity
SsrB construct	pH 7.4
	Exp 1	Exp 2	Exp 3	Exp 4	Exp 5	Exp 6	Exp 7	Exp 8		Average	Std dev
SsrB	99.9998	99.9999	100	100	100	100	100	100		100	7.8147e-05
2H1	65.2217	86.3233								75.7725	14.9211
2H2	39.5781	49.8668	44.0349							44.4932	5.15964
2H3	71.0706	80.7865	75.5441							75.8004	4.86302
3H	61.6544	57.311	55.9129	41.2678						54.0365	8.85655
Vector	17.675	19.3885	14.0372							17.0336	2.73273
	PsifA-lacZ activity
SsrB construct	pH 5.6
	Exp 1	Exp 2	Exp 3	Exp 4	Exp 5	Exp 6	Exp 7	Exp 8		Average	Std dev
SsrB	352.866	575.952	574.477	586.496	619.988	890.429	379.442	804.066		597.965	184.194
2H1	331.848	399.486								365.667	47.8275
2H2	235.419	245.741	389.554							290.238	86.1648
2H3	374.763	340.696	555.899							423.786	115.674
3H	377.636	515.88	491.37	291.935						419.205	104.05
Vector	15.1989	20.1235	20.4266							18.583	2.9346
SsrB construct	Fold change (7.4/5.6)
	Exp 1	Exp 2	Exp 3	Exp 4	Exp 5	Exp 6	Exp 7	Exp 8		Average	Std dev
SsrB	3.52867	5.75953	5.74477	5.86494	6.19988	8.90429	3.79442	8.04066		5.97965	1.84194
2H1	5.088	4.62779								4.8579	0.325417
2H2	5.94822	4.92795	8.84648							6.57422	2.03289
2H3	5.27311	4.21724	7.3586							5.61631	1.59856
3H	6.12505	8.57376	5.22125	12.5008						8.10522	3.25469
Vector	0.85991	1.03791	1.45518							1.11767	0.305545
		t-Test: Two-Sample Assuming Unequal Variances
			SsrB	2H1		SsrB	2H2		SsrB	2H3		SsrB	3H
		Mean	5.97965	4.8579		5.97965	6.57422		5.97965	5.61631		5.97965	8.10522
		Variance	3.39273	0.105896		3.39273	4.13262		3.39273	2.55538		3.39273	10.593
		Observations	8	2		8	3		8	3		8	4
		Hypothesized Mean Difference	0			0			0			0
		df	8			3			4			4
		t Stat	1.62412			-0.442967			0.32166			-1.21266
		P(T<=t) two-tail	0.143005			0.687785			0.763818			0.291979
		t Critical two-tail	2.306			3.18245			2.77645			2.77645
