# Supplementary material for: A pH-sensitive switch activates virulence in Salmonella
Source: eLife journal article supplement (doi:10.7554/elife.85690), 2023-09-14
Supplement: supp [file Fig 1a-d_SsrB,SsrBc_Single molecule unzipping.xlsx]

## Sheet: SsrB
Single molecule unzipping- SsrB
	pH 7.4 Binding probability
Conc (nM)	1	2	3	4		Average	Std error
50	0.03125	0.0625	0.03125	0		0.03125	0.0127578
100	0.125	0.03125	0			0.0520833	0.0375578
150	0.09375	0.03125	1	1		0.53125	0.270933
250	1	1	1			1	0
400	1	1				1	0
	pH 6.1 Binding probability
Conc (nM)	1	2	3	4	5		Average	Std error
1	0	0	0.0625	0			0.015625	0.015625
2	0	0.03125	0.0625				0.03125	0.0180422
3.5	0	0.0606061	0	0.03125			0.022964	0.0145496
5	0.1875	0.96875	0.71875	0.787879	0.40625		0.613826	0.140021
7.5	1	0.75	0.25	1	1		0.8	0.145774
10	0.970588	0.90625	1	0.852941			0.932445	0.0329464

## Sheet: SsrBc
Single molecule unzipping- SsrBc
	pH 7.4 Binding probability
Conc (nM)	1	2	3	4	5	6		Average	Std error
50	0	0	0	0				0	0
100	0	0.28125	0					0.09375	0.09375
250	0.625	0.03125	0	0.03125	0			0.1375	0.122075
400	0.25	0.15625	0.375	0.09375	0.0625	0.125		0.177083	0.0475073
750	0.75	0.59375	0.53125	1				0.71875	0.104427
1000	1	0.65625	1	0.59375				0.8125	0.109002
1500	0.96875							0.96875
	pH 6.1 Binding probability
Conc (nM)	1	2	3	4	5	6	7	8		Average	Std error
25	0.03125	0	0	0						0.0078125	0.0078125
50	0.0625	0.0625	0.03125							0.0520833	0.0104167
100	0.65625	0.03125	0.03125	1	0.53125	0.03125	0.6875	0.28125		0.40625	0.130059
175	0.15625	0.25	0.28125	0.21875	0.9375	0.75				0.432292	0.133419
250	1	0.875	1	0.90625						0.945312	0.0322118
400	1	0.756757	1	0.90625	0.9375					0.920101	0.0446898
