# Supplementary material for: A pH-sensitive switch activates virulence in Salmonella
Source: eLife journal article supplement (doi:10.7554/elife.85690), 2023-09-14
Supplement: supp [file Fig 1e_SsrB,SsrBc_MGM_PsifA-lacZ.xlsx]

## Sheet: Fig 1e
	PsifA-lacZ activity
SsrB construct	pH 7.4
	Exp 1	Exp 2	Exp 3	Exp 4	Exp 5	Exp 6	Exp 7	Exp 8		Average	Std dev
SsrB	102.505	89.2342	101.274	102.088	95.4199	100	97.8563	103.675		100	4.88792
	97.4945	110.766	98.7259	97.9122	104.58	102.144	96.3247
SsrBc	34.583	58.3563	77.5754	104.886	28.1531					61.3285	31.9487
	31.3957	53.877	84.5576	112.145	27.756
Vector	16.7863	17.675	19.3885	14.0372						17.4843	2.24921
	19.5345
	PsifA-lacZ activity
SsrB construct	pH 5.6
	Exp 1	Exp 2	Exp 3	Exp 4	Exp 5	Exp 6	Exp 7	Exp 8		Average	Std dev
SsrB	691.982	499.75	461.625	612.767	621.474	718.895	715.488	719.797		613.126	95.7588
	654.508	569.08	462.753	560.225	539.483	749.93	619.136
SsrBc	65.7603	54.5884	52.0658	57.9087	64.6913					59.9959	6.43656
	67.5158	54.974	53.4418	59.2295	69.7833
Vector	18.0452	15.1989	20.1235	20.4266						17.0072	3.84023
	11.2419
