# Supplementary material for: A pH-sensitive switch activates virulence in Salmonella
Source: eLife journal article supplement (doi:10.7554/elife.85690), 2023-09-14
Supplement: supp [file Fig 1f,g_SsrB,SsrBc_HeLa cell infection.xlsx]

## Sheet: Fig 1f
HeLa cell infection
SsrB construct	PsifA-lacZ activity
	Exp 1	Exp 2	Exp 3		Average	Std dev
SsrB	82.9908	98.3134	91.3284		100	12.122
	117.009	101.687	108.672
SsrBc	33.3742	26.1406	32.4913		29.8074	2.99977
	28.695	26.915	31.2283
Vector	1.28495	10.3151	6.23851		5.94619	4.52218
t-Test: Two-Sample Assuming Unequal Variances
			SsrB	SsrBc
		Mean	100	29.8074
		Variance	146.942	8.99861
		Observations	6	6
		Hypothesized Mean Difference	0
		df	6
		t Stat	13.7685
		P(T<=t) two-tail	9.12944e-06
		t Critical two-tail	2.44691

## Sheet: Fig 1g
HeLa cell infection
	Fold replication
SsrB construct	cfu/ml (16 h/ 2h)
	Exp 1	Exp 2	Exp 3		Average	Std dev
SsrB	23.5	19.33	17.1977		20.0092	3.20557
SsrBc	5.54	10.18	2.38889		6.0363	3.91919
Vector	4.05112	5.02439			4.53775	0.688206
		t-Test: Two-Sample Assuming Unequal Variances
			SsrB	SsrBc
		Mean	20.0092	6.0363
		Variance	10.2757	15.3601
		Observations	3	3
		Hypothesized Mean Difference	0
		df	4
		t Stat	4.77997
		P(T<=t) two-tail	0.0087757
		t Critical two-tail	2.77645
