# Supplementary material for: A pH-sensitive switch activates virulence in Salmonella
Source: eLife journal article supplement (doi:10.7554/elife.85690), 2023-09-14
Supplement: supp [file Fig 2-Supplement fig 3e,f_HeLa cell infection.xlsx]

## Sheet: Fig 2-Supplement fig 3e
HeLa cell infection
SsrB construct	PsifA-lacZ activity
	Exp 1	Exp 2	Exp 3		Average	Std dev
SsrB	91.3284	98.3134	82.9908		100	12.122
	108.672	101.687	117.009
2H1	114.446	111.717	126.619		113.144	12.4155
	96.1604	127.01	102.911
2H2	70.0399	86.4488	111.19		88.6561	17.584
	67.3628	93.8852	103.01
2H3	65.332	113.883	59.2379		94.3602	29.442
	81.1354	127.06	119.513
Vector	6.23851	10.3151	1.28495		4.02621	3.6057
	3.24328	1.38306	1.69237
		t-Test: Two-Sample Assuming Unequal Variances
			SsrB	2H1		SsrB	2H2		SsrB	2H3
		Mean	100	113.144		100	88.6561		100	94.3602
		Variance	146.942	154.146		146.942	309.195		146.942	866.832
		Observations	6	6		6	6		6	6
		Hypothesized Mean Difference	0			0			0
		df	10			9			7
		t Stat	-1.85547			1.30104			0.433882
		P(T<=t) two-tail	0.0932057			0.225564			0.677432
		t Critical two-tail	2.22814			2.26216			2.36462

## Sheet: Fig 2-Supplement fig 3f
HeLa cell infection
SsrB construct	Fold replication
	cfu/ml (16 h/ 2h)
Construct	Exp 1	Exp 2	Exp 3	Exp 4	Exp 5		Average	Std dev
SsrB	15.94	10.65	15.94	12.65	10.7		13.176	2.64893
2H1	9.9	9.57	13.77	9.6			10.71	2.04543
2H2	16.5	11.91	10.25	14.37			13.2575	2.74544
2H3	10.5	14.62	14.82	12.28	20.25		14.494	3.67789
Vector	5.24	2.58	3.13				3.65	1.40417
		t-Test: Two-Sample Assuming Unequal Variances
			SsrB	2H1		SsrB	2H2		SsrB	2H3
		Mean	13.176	10.71		13.176	13.2575		13.176	14.494
		Variance	7.01683	4.1838		7.01683	7.53743		7.01683	13.5269
		Observations	5	4		5	4		5	5
		Hypothesized Mean Difference	0			0			0
		df	7			6			7
		t Stat	1.57569			-0.044948			-0.650221
		P(T<=t) two-tail	0.159101			0.965607			0.536298
		t Critical two-tail	2.36462			2.44691			2.36462
