# Supplementary material for: A pH-sensitive switch activates virulence in Salmonella
Source: eLife journal article supplement (doi:10.7554/elife.85690), 2023-09-14
Supplement: supp [file Fig 2b,c_MGM_PsifA-lacZ.xlsx]

## Sheet: Fig 2bc
	PsifA-lacZ activity
SsrB construct	pH 7.4
	1	2	3	4	5	6	7	8	9	10	11	12		Average	Std dev
SsrB	95.4911	90.6389	101.362	86.6633	103.817	89.2341	101.274	102.088	100	97.8563	103.675	95.4867		100	6.78578
	97.3731	116.497	109.505	102.469	96.1835	110.766	98.7258	97.9121		102.144	96.3247	104.513
H12Q	103.023	87.5681	99.6962	91.5752	85.4381									98.9124	14.3559
	86.1513	118.53	128.146	98.4957	90.5004
H12A	73.3974	80.6044	63.8506											65.4857	11.8888
	71.4134	53.3193	50.3292
H12N	88.255	89.1246	58.1545	91.2441										78.2735	16.3642
		93.55	54.7488	72.8376
Vector	17.675	19.3885	14.0372											17.0336	2.73273
	PsifA-lacZ activity
SsrB construct	pH 7.4
	Exp 1	Exp 2	Exp 3	Exp 4	Exp 5	Exp 6	Exp 7	Exp 8	Exp 9	Exp 10	Exp 11	Exp 12		Average	Std dev
SsrB	741.903	589.864	552.167	537.123	517.012	499.747	461.623	612.77	718.895	715.488	719.797	444.437		596.989	92.7776
	510.142	633.865	663.016	589.652	657.268	569.077	462.751	560.227		749.93	619.136	604.855
H12Q	119.102	100.214	92.3004	89.8284	70.8268									90.9757	15.4857
	107.445	72.0852	80.637	80.6877	96.6309
H12A	104.475	117.073	131.025											121.26	12.7982
	109.072	133.989	131.925
H12N	115.969	118.365	156.925	83.8513										113.718	29.2481
		111.812	137.533	71.5708
Vector	15.1989	20.1235	20.4266											18.583	2.9346
SsrB construct	Fold change (pH 7.4/pH 5.6)
	Exp 1	Exp 2	Exp 3	Exp 4	Exp 5	Exp 6	Exp 7	Exp 8	Exp 9	Exp 10	Exp 11	Exp 12		Average	Std dev
SsrB	6.49185	5.90786	5.76278	5.9576	5.8714	5.34412	4.62187	5.86499	7.18895	7.32709	6.69466	5.24646		6.0233	0.791507
H12Q	1.19756	0.836003	0.759024	0.897118	0.951797									0.9283	0.16673
H12A	1.47466	1.87466	2.30295											1.88409	0.414225
H12N	1.31402	1.26004	2.60805	0.947224										1.53233	0.735149
Vector	0.85991	1.03791	1.45518											1.11767	0.305545
	t-Test: Two-Sample Assuming Unequal Variances
		SsrB	H12Q			SsrB	H12A			SsrB	H12N
	Mean	6.0233	0.9283		Mean	6.0233	1.88409		Mean	6.0233	1.53233
	Variance	0.626483	0.027799		Variance	0.626483	0.171583		Variance	0.626483	0.540445
	Observations	12	5		Observations	12	3		Observations	12	4
	Hypothesized Mean Difference	0			Hypothesized Mean Difference	0			Hypothesized Mean Difference	0
	df	13			df	6			df	6
	t Stat	21.1985			t Stat	12.5143			t Stat	10.3765
	P(T<=t) one-tail	9.10137e-12			P(T<=t) one-tail	7.96072e-06			P(T<=t) one-tail	2.34482e-05
	t Critical one-tail	1.77093			t Critical one-tail	1.94318			t Critical one-tail	1.94318
	P(T<=t) two-tail	1.82027e-11			P(T<=t) two-tail	1.59214e-05			P(T<=t) two-tail	4.68964e-05
	t Critical two-tail	2.16037			t Critical two-tail	2.44691			t Critical two-tail	2.44691
