# Supplementary material for: A pH-sensitive switch activates virulence in Salmonella
Source: eLife journal article supplement (doi:10.7554/elife.85690), 2023-09-14
Supplement: supp [file Fig 2d,e-H12Q-Single molecule unzipping.xlsx]

## Sheet: H12Q
Single molecule unzipping: H12Q
	pH 7.4 Binding probability
Conc (nM)	1	2	3		Average	Std error
50	0.03125	0.03125	0		0.0208333	0.0104167
100	0.03125	0	0.09375		0.0416667	0.0275599
150	0.53125	0.375	0.34375		0.416667	0.0579975
200	0.78125	0.71875	0.71875		0.739583	0.0208333
250	0.75	0.875	0.90625		0.84375	0.0477352
300	1	0.90625	0.625		0.84375	0.112673
400	1	0.84375	0.9375		0.927083	0.0454052
	pH 6.1 Binding probability
Conc (nM)	1	2	3	4	5		Average	Std err
25	0.0625	0.03125	0				0.03125	0.0180422
50	0.1875	0.03125	0.1875				0.135417	0.0520833
100	0.09375	0.09375	0.8125	0.46875	0.53125		0.4	0.137784
150	0.75	0.96875	0.9375	0.25	0.875		0.75625	0.131992
200	1	0.9375	0.96875	1			0.976562	0.0149598
250	1	1		1			1	0
