# Supplementary material for: A pH-sensitive switch activates virulence in Salmonella
Source: eLife journal article supplement (doi:10.7554/elife.85690), 2023-09-14
Supplement: supp [file Fig 3a,b_MGM_PsifA-lacZ.xlsx]

## Sheet: Fig 3ab
	PsifA-lacZ activity
SsrB construct	pH 7.4
	Exp 1	Exp 2	Exp 3	Exp 4	Exp 5	Exp 6	Exp 7	Average	Std dev
SsrB	97.8153	89.262	99.8126	101.412	100.19	102.105	100.262	100	4.41377
	102.186	110.737	100.188	98.5875	99.81	97.8955	99.738
H12K	39.8053	27.9006	31.8746					33.5074	4.07947
	36.0153	31.7424	33.706
H12Y	27.7672	26.4652	37.9483					29.5323	4.70813
	25.2068	31.9642	27.8422
H12F	10.8704	29.1024	24.0225	33.4967				24.1746	8.45614
	11.7148	29.3951	25.2695	29.5258
Vector	17.675	19.3885	14.0372					17.0336	2.73273
	PsifA-lacZ activity
SsrB construct	pH 7.4
	Exp 1	Exp 2	Exp 3	Exp 4	Exp 5	Exp 6	Exp 7	Average	Std dev
SsrB	521.667	632.008	531.693	311.095	549.217	554.948	447.439	496.922	107.98
	446.905	586.752	574.559	290.717	586.15	559.052	364.701
H12K	76.0987	114.535	88.7186					88.3026	21.0786
	67.2711	113.046	70.1454
H12Y	162.597	242.389	194.13					202.142	36.9684
	173.972	252.765	186.999
H12F	73.648	190.834	201.085	164.134				158.932	53.3758
	80.0978	198.612	204.302	158.744
Vector	15.1989	20.1235	20.4266					18.583	2.9346
SsrB construct	Fold (pH 5.6/ pH 7.4)
	Exp 1	Exp 2	Exp 3	Exp 4	Exp 5	Exp 6	Exp 7	Average	Std dev
SsrB	4.84283	6.09384	5.53124	3.00906	5.67683	5.57	4.0607	4.96922	1.08979
H12K	1.89091	3.81573	2.42242					2.70969	0.994046
H12Y	6.35348	8.47439	5.79307					6.87365	1.41432
H12F	6.80738	6.65749	8.22419	5.12323				6.70307	1.26789
Vector	0.85991	1.03791	1.45518					1.11767	0.305545
			t-Test: Two-Sample Assuming Unequal Variances
				SsrB	H12K		SsrB	H12Y		SsrB	H12F
			Mean	4.96922	2.70969		4.96922	6.87365		4.96922	6.70307
			Variance	1.18765	0.988128		1.18765	2.0003		1.18765	1.60756
			Observations	7	3		7	3		7	4
			Hypothesized Mean Difference	0			0			0
			df	4			3			6
			t Stat	3.19852			-2.08233			-2.29343
			P(T<=t) two-tail	0.0329471			0.128715			0.0616537
			t Critical two-tail	2.77645			3.18245			2.44691
