# Supplementary material for: A pH-sensitive switch activates virulence in Salmonella
Source: eLife journal article supplement (doi:10.7554/elife.85690), 2023-09-14
Supplement: supp [file Fig 3c,d_HeLa cell infection.xlsx]

## Sheet: Fig 3c
HeLa cell infection
SsrB construct	PsifA-lacZ activity
	Exp 1		Exp 2		Exp 3			Average	Std dev
SsrB	100	99.9967	118.984	81.0134	90.1139	109.886		99.9991	13.5378
H12Q	70.3294	75.7138	42.74	68.9089	52.9766	59.815		61.7473	12.3445
H12Y	60.8409	61.4139	54.509	53.6091	60.4059	59.3045		58.3472	3.40469
Vector	12.4496	3.2007			4.11212	7.59599		6.8396	4.19226
		t-Test: Two-Sample Assuming Unequal Variances
			SsrB	H12Q		SsrB	H12Y
		Mean	99.9991	61.7473		99.9991	58.3472
		Variance	183.272	152.388		183.272	11.5919
		Observations	6	6		6	6
		Hypothesized Mean Difference	0			0
		df	10			6
		t Stat	5.1142			7.30876
		P(T<=t) two-tail	0.000454518			0.000334752
		t Critical two-tail	2.22814			2.44691

## Sheet: Fig 3d
HeLa cell infection
	Fold replication
SsrB construct	cfu/ml (16 h/ 2h)
	Exp 1	Exp 2	Exp 3	Exp 4		Average	Std dev
SsrB	19.3277	17.1977	23.125	16.3265		18.9942	3.02867
H12Q	5.26316	3.20755	10.6122	6.33333		6.35407	3.12107
H12Y	4.41989	7.2819	6.30435	12.4324		7.60964	3.42759
Vector	5.02439		5.20513	5.42373		5.21775	0.199968
		t-Test: Two-Sample Assuming Unequal Variances
			SsrB	H12Q		SsrB	H12Y
		Mean	18.9942	6.35407		18.9942	7.60964
		Variance	9.17284	9.74106		9.17284	11.7483
		Observations	4	4		4	4
		Hypothesized Mean Difference	0			0
		df	6			6
		t Critical one-tail	1.94318			1.94318
		P(T<=t) two-tail	0.00113821			0.00250673
		t Critical two-tail	2.44691			2.44691
